# Supplementary material for: Semistructured interviewing in primary care research: a balance of relationship and rigour
Source: PubMed Central journal article supplement — Fam Med Community Health. 2019 Mar 8;7(2):e000057. doi: 10.1136/fmch-2018-000057 (PMC6910737; doi:10.1136/fmch-2018-000057), 2019-03-08
Supplement: fmch-2018-000057supp001.pdf [file fmch-2018-000057supp001.pdf]

---

 Appendix A. *Example interview guide*

| Topic                        | Guiding Questions                                                                                                                                                                                    | Possible Follow-Up Questions                                                                                                            |
|------------------------------|------------------------------------------------------------------------------------------------------------------------------------------------------------------------------------------------------|-----------------------------------------------------------------------------------------------------------------------------------------|
| General Pregnancy            | Tell me about how your pregnancy has been so far.                                                                                                                                                    | What has been challenging?<br>What has been surprising?                                                                                 |
| Diet During Pregnancy        | I am curious what you've been eating during your pregnancy. Tell me about what you ate throughout the day yesterday.<br>What are your thoughts about what you should eat and drink during pregnancy? | What did you eat (in the morning, afternoon, evening)?<br>What is healthy to eat?<br>What is unhealthy to eat?                          |
| Exercise During Pregnancy    | What are your thoughts about what you should do for exercise during pregnancy?                                                                                                                       | What is healthy to do for exercise?<br>What is unhealthy to do for exercise?<br>Tell me more about what your physical activity is like. |
| Weight Gain During Pregnancy | Your body changes a lot during pregnancy. What have you noticed changing?                                                                                                                            | How do you feel?<br>How do you feel about how much weight you have gained?                                                              |
| Intervention Development     | We want to know how to help women be healthy during their pregnancy. What would have helped you to make healthy choices during your pregnancy?                                                       | What made it hard for you to (eat well, exercise, or gain the amount of weight you wanted to during your pregnancy)?                    |
| Summary                      | Thank you for taking the time to tell me a little bit about your pregnancy. Is there anything else you think I should know?                                                                          |                                                                                                                                         |

---
